# Supplementary material
Source: Research Square preprint supplement (doi:10.21203/rs.3.rs-9498496/v1)
Supplement: Supplementary file 1 [file a881b58be4776de5cfe9db92.pdf]

# INFORMED CONSENT FORM

**Study Title:** Innovative Entrepreneurial Strategies for Health Equity in Underserved Communities

**Principal Researcher:** Marilyn V. Rondon

**Co-Researchers:** Juvy S. Llorca  
Jioffre A. Acopra

**Department/University:** College of Liberal Arts and Sciences  
College of Business Financial Science  
University of Makati, J.P. Rizal Ext., West Rembo, Taguig City

## Purpose of the Study

The study aims to explore innovative community-driven entrepreneurial strategies that promote health equity in underserved communities. Specifically, it examines how these initiatives enhance healthcare access, strengthen community trust, and support participatory service delivery despite existing structural challenges. The findings of the study may provide practical and policy-relevant insights into equitable healthcare systems and increasing healthcare utilization among marginalized populations.

## Participation

We invite you to participate in an interview or focus group discussion for approximately 90 minutes. We will ask you to share your views and experiences about health equity and access to healthcare services in your community. Your participation may contribute to the development of practical recommendations for healthcare policies and services.

## Research Description

The study will employ a qualitative research design using in-depth interviews and focus group discussions with healthcare professionals, community leaders, and members of underserved communities. The study seeks to gather insights regarding healthcare access, health equity challenges, and community-driven entrepreneurial initiatives. Data gathered from the participants will be analyzed through thematic analysis to identify recurring patterns, experiences, and strategies relevant to equitable healthcare delivery.

## Potential Risks and Discomforts

There are no anticipated major risks associated with your participation in this study. However, some questions may cause minimal discomfort or emotional uneasiness. You may choose not to answer any question that makes you uncomfortable, and you may withdraw from the study at any time without penalty or negative consequences.

## **Potential Benefits**

Your participation in this study may help improve healthcare strategies and services for underserved and marginalized communities. The findings may also support the development of more equitable healthcare policies and community-based health initiatives.

## **Confidentiality**

All information gathered from participants during the study will be strictly confidential and not disclosed in any reports, presentations, or publications related to the study. Through codes or pseudonyms may be used to protect them. Only the research team will have access to the collected data, in accordance with ethical standards and data protection regulations.

## **Voluntary Participation and Withdrawal**

Participation in this study is completely voluntary. You may refuse to answer any questions or withdraw from the study at any time without penalty or negative consequences. You may also request that any information you have previously shared not be included in the study analysis.

## **Compensation and Costs**

There will be no monetary compensation for participating in this study. However, there are no anticipated costs associated with your participation.

## **Consent**

By signing below, you confirm that you have read and understood the information provided in this informed consent form and voluntarily agree to participate in this study.

Thank you.

\_\_\_\_\_  
Name and Signature of Participant

Date: \_\_\_\_\_

\_\_\_\_\_  
Name and Signature of Researcher  
Conducting the Interview

Contact Number: \_\_\_\_\_

Date: \_\_\_\_\_
